# Supplementary material for: The cost-effectiveness of the use of selective media for the diagnosis of melioidosis in different settings
Source: PLoS Negl Trop Dis. 2019 Jul 15;13(7):e0007598. doi: 10.1371/journal.pntd.0007598 (PMC6658006; doi:10.1371/journal.pntd.0007598)
Supplement: S1 Table — (XLSX) [file pntd.0007598.s001.xlsx]

## Sheet: Laos All Culture Positives 
Study number	Blood culture	Throat swab	Pus/Wound swab	Sputum	Urine
1089	1	0	2	2	0
1090	1	1	2	0	2
1091	0	0	1	2	0
1092	0	0	1	0	0
1093	1	0	2	2	0
1094	0	1	1	2	2
1095	0	0	1	2	2
1096	1	0	1	2	0
1097	1	2	2	2	1		0 = negative
1098	0	0	1	2	2		1 = positive
1099	0	0	1	2	0		2 = Not done
1100	0	1	2	1	0
1101	0	0	2	1	0
1102	1	2	2	2	2
1103	1	0	2	1	0
1104	1	0	2	2	0
1105	0	0	1	2	2
1106	1	2	2	2	2
1107	1	0	2	2	0
1108	1	1	2	2	0
1109	1	0	2	0	1
1110	0	1	2	2	2
1111	1	0	2	2	1
1112	1	0	2	2	1
1113	0	1	1	2	0
1114	0	1	2	1	0
1115	1	1	2	2	1
1116	1	0	0	0	0
1117	0	1	2	2	0
1118	1	0	2	1	0
1119	1	1	2	2	2
1120	1	0	2	2	0
1121	1	2	2	2	2
1122	1	0	2	2	1
1123	0	1	2	2	2
1124	0	0	1	2	0
1125	1	0	2	2	1
1126	1	1	2	2	2
1127	0	0	1	2	0
1128	1	2	1	2	2
1129	2	2	1	2	2
1130	2	2	1	2	2
1131	1	0	0	2	0
1132	1	1	2	2	0
1133	1	1	1	2	1
1134	1	0	2	2	0
1135	1	1	1	2	2
1136	1	2	2	2	2
1137	0	0	1	2	0
1138	1	0	2	2	0
1139	1	2	2	2	2
1140	0	1	2	2	0
1141	1	1	2	2	1
1142	1	0	2	1	0
1143	1	2	2	2	1
1144	2	2	1	2	2
1145	1	1	1	2	2
1146	0	1	2	2	2
1147	0	2	1	2	0
1148	0	1	2	2	0
1149	0	0	1	2	0
1150	0	1	2	2	0
1151	0	1	1	2	2
1152	0	0	1	2	0
1153	2	2	1	2	2
1154	1	1	2	2	0
1155	1	1	2	1	0
1156	1	1	2	1	1
1157	0	1	2	1	0
1158	1	1	1	0	0
1159	0	1	2	2	2
1160	1	1	1	2	2
1161	0	1	2	0	0
1162	1	1	1	2	2
1163	2	2	1	2	2
1164	1	1	2	0	0
1165	1	0	2	2	0
1166	1	0	2	0	1
1167	0	1	2	2	0
1168	0	2	2	2	1
1169	0	0	1	2	0
1170	0	1	2	1	1
1171	1	2	2	2	1
1172	1	0	2	2	0
1173	1	0	2	2	2
1174	1	1	2	1	0
1175	0	1	2	2	2
1176	1	1	2	2	0
1177	1	0	0	0	0
1178	0	1	2	2	2
1179	0	2	1	2	2
1180	0	1	2	2	2
1181	0	0	1	2	2
1182	1	0	2	2	2
1183	1	0	2	2	0
1184	1	1	1	2	1
1185	1	2	2	2	0
1186	0	1	2	2	2
1187	0	0	1	0	0
1188	1	0	1	2	0
1189	0	0	1	2	0
1190	0	0	1	2	0
1191	1	1	2	2	1
1192	2	2	1	2	2
1193	1	2	1	0	0
1194	1	2	1	2	1
1195	1	1	2	2	1
1196	1	2	1	2	2
1197	0	0	1	0	0
1198	1	1	2	1	2
1199	0	0	2	1	0
1200	1	1	2	2	2
1201	0	1	2	2	2
1202	1	1	2	1	0
1203	0	1	0	2	2
1204	1	0	2	2	2
1205	1	1	2	1	0
1206	1	1	2	2	2
1207	1	1	2	1	1
1208	0	1	2	2	2
1209	0	0	1	2	2
1210	0	2	1	2	2
1211	2	2	1	2	2
1212	0	0	1	2	2
1213	2	2	1	2	2
1214	1	1	2	0	2
1215	1	0	2	2	2
1216	0	0	2	1	0
1217	1	2	2	2	2
1218	0	0	2	2	1
1219	1	1	2	1	0
1220	1	0	2	2	0
1221	0	0	1	2	0
1222	1	1	2	2	1
1223	0	0	1	2	0
1224	1	0	2	2	2
1225	1	0	2	0	0
1226	0	0	1	2	0
1227	1	0	2	2	0
1228	0	1	2	2	0
1229	1	0	2	2	0
1230	1	1	2	2	0
1231	1	0	2	2	0
1232	1	1	2	2	2
1233	0	0	1	2	2
1234	1	2	2	2	2

## Sheet: Laos Non-Sterile site positives
MM number	Age (y)	Specimen type	Media				Diagnosis only made with Ashdowns	Diagnosis only made with SB
			Summary	positive on non-selective media	positive on Ashdowns agar	positive on Selective Broth subculture only
1091	12	Pus/wound	1	1(growth 1+)	1(growth 2+)	NA
		Pus/wound	1	1(growth 1+)	1	1
1092	40	Pus/wound	1	1(growth 1+)	NA	NA
		Pus/wound	2	0	1(growth 1+)	1
1094	11	Throat	2	Not done	1(growth 2+)	1(growth 2+)			1 = positive on non-selective media
		Pus/wound	1	1(growth 1+)	1(growth 1+)	1			2 = positive on Ashdowns agar
1095	5	Pus/wound	1	1(growth 1+)	NA	NA			3 = positive on Selective Broth subculture only
1098	37	Pus/wound	1	1(growth 3+)	1(growth 3+)	1
1099	60	Pus/wound	2	0	1	1	Yes		NA = Not recorded
1100	60	Throat	2	Not done	1	1	Yes		1 = Positive
		Throat	2	Not done	1	1			0 = Negative
		Sputum	2	0	1	1	Yes
1101	63	Sputum	3	0	0	1		Yes
1105	58	Pus/wound	1	1	1	1
		Pus/wound	1	1	NA	NA
1110	52	Throat	2	Not done	1	1	Yes
1113	60	Throat	2	Not done	1	1
		Pus/wound	1	1	0	0
1114	44	Throat	2	Not done	1	1
		Throat	2	Not done	1	1
		Sputum	1	1	1	1
1117	9	Throat	2	Not done	1	1	Yes
1123	13	Throat	2	Not done	1	1	Yes
1124	44	Pus/wound	1	1	1	1
1127	67	Pus/wound	1	1	1	1
		Pus/wound	1	1	1	1
1129	24	Pus/wound	1	1	1	1
1130	56	Pus/wound	1	1	1	1
1137	3	Pus/wound	1	1	1	1
1140	58	Throat	2	Not done	1	1	Yes
1144	52	Pus/wound	1	1	1	1
1146	7	Throat	2	Not done	1	1	Yes
1147	30	Pus/wound	1	1	1	1
1148	10	Throat	2	Not done	1	1	Yes
1149	9	Pus/wound	1	1	1	1
1150	55	Throat	2	Not done	1	1	Yes
1151	38	Throat	2	Not done	1	1
		Pus/wound	1	1	1	1
1152	5	Pus/wound	1	1	NA	NA
1153	49	Pus/wound	2	0	1	1	Yes
1157	48	Throat	2	Not done	1	1
		Sputum	1	1	NA	NA
		Sputum	1	1	NA	NA
1159	4	Throat	2	Not done	1	1	Yes
1161	55	Throat	3	Not done	0	1		Yes
1163	16	Pus/wound	1	1	1	1
1167	60	Throat	2	Not done	1	1	Yes
1168	60	Urine	2	0	1	Not done	Yes
1169	64	Pus/wound	1	1	1	1
1170	76	Throat	2	Not done	1	1	Yes
		Sputum	2	0	1	1
		Urine	2	0	1	Not done
1175	6	Throat	2	Not done	1	1	Yes
1178	15	Throat	2	Not done	1	1	Yes
1179	55	Pus/wound	1	1	1	1
1180	55	Throat	2	Not done	1	1	Yes
1181	60	Pus/wound	2	0	1	1
1186	46	Throat	2	Not done	1	1	Yes
1187	45	Pus/wound	1	1	NA	NA
1189	60	Pus/wound	1	1	1	1
1190	2	Pus/wound	1	1	1	1
		Pus/wound	1	1	1	1
1192	63	Pus/wound	1	1	NA	NA
1197	38	Pus/wound	1	1	1	1
		Pus/wound	1	1	1	1
1199	40	Sputum	2	0	1	1	Yes
1201	52	Throat	2	Not done	1	1	Yes
1203	8	Throat	2	Not done	1	1	Yes
1208	57	Throat	2	Not done	1	NA	Yes
1209	48	Pus/wound	1	1	NA	NA
1210	38	Pus/wound	1	1	1	1
1211	24	Pus/wound	1	1	1	1
1212	9	Pus/wound	1	1	1	1
		Pus/wound	1	1	NA	NA
1213	40	Pus/wound	1	1	NA	NA
1216	65	Sputum	2	0	1	1	Yes
1218	65	Urine	2	0	1	Not done	Yes
1221	56	Pus/wound	1	1	1	1
1223	3	Pus/wound	1	1	1	1
1226	50	Pus/wound	1	1	1	1
1228	6	Throat	2	Not done	1	0	Yes
1233	44	Pus/wound	1	1	1	1

## Sheet: Cambodia All results
Study number	Specimen type	Specimen date	Date of birth	Positive on non-selective media	Positive on ASH agar	Positive on SB subculture	Positive on SB subculture only
01-2012-005548	PUS SWAB	2017-02-22	2008-01-22	1	9	9	0
01-2016-007477	PUS SWAB	2017-03-07	2013-12-09	1	1	1	0	Coding	Definition
2017-006039	SKIN / WOUND SWAB	2017-03-11	2013-08-26	1	9	9	0	Yellow highlight	Duplicate specimens for a single patient (identified by codenum)
01-2017-001566	BLOOD CULTURE	2017-04-11	2017-03-30	1	9	9	0	0	No / not isolated
2017-009348	PUS SWAB	2017-04-23	2005-03-01	1	1	1	0	1	Yes / isolated
01-2015-005489	PUS SWAB	2017-04-27	2014-12-14	1	1	1	0	9	Not done
2017-010678	PUS (CLOSED / DEEP SITE)	2017-05-09	2010-12-28	1	1	1	0
2010-001072	PUS SWAB	2017-06-05	2009-08-29	1	1	1	0
2017-013022	PUS SWAB	2017-06-06	2014-06-11	1	1	1	0
01-2014-000201	PUS SWAB	2017-06-07	2013-11-05	1	1	1	0
2016-004036	BLOOD CULTURE	2017-06-09	2016-01-06	1	9	9	0
2016-004036	PLEURAL FLUID	2017-06-10	2016-01-06	1	9	9	0
2016-004036	PLEURAL FLUID	2017-06-12	2016-01-06	1	9	9	0
2017-014766 / 01-2017-002656	Cambodia	2017-06-16	2005-03-07	1	9	9	0
2015-014060	PUS SWAB	2017-06-16	2014-01-02	1	1	1	0
2017-013297	THROAT SWAB	2017-06-16	2016-03-13	9	0	1	1
2017-014449	PUS SWAB	2017-06-19	2008-07-17	1	1	1	0
2017-014766 / 01-2017-002656	PUS SWAB	2017-06-20	2005-03-07	1	1	1	0
2017-014775	PUS SWAB	2017-06-21	2004-05-10	1	9	9	0
2017-015209	EAR SWAB	2017-06-26	2011-10-02	1	0	1	0
2017-007308	PUS SWAB	2017-06-30	2014-04-26	1	1	1	0
2011-025058	THROAT SWAB	2017-06-30	2010-11-23	9	1	1	0
2017-015900	PUS SWAB	2017-07-01	2016-01-02	1	1	1	0
2017-015319	PUS (CLOSED / DEEP SITE)	2017-07-04	2008-10-06	1	1	1	0
01-2015-007331	PUS SWAB	2017-07-15	2015-04-15	1	1	1	0
2017-017313	PUS SWAB	2017-07-17	2014-05-10	1	1	1	0
2014-009818	BLOOD CULTURE	2017-07-21	2012-01-07	1	9	9	0
2006-022201	PUS SWAB	2017-07-21	2005-06-05	0	0	1	1
2017-017787	THROAT SWAB	2017-07-22	2015-07-24	9	0	1	1
2016-005878	PUS SWAB	2017-07-27	2006-03-01	1	1	1	0
2007-019881	PUS SWAB	2017-07-28	2007-02-13	1	1	1	0
2017-018402	PUS SWAB	2017-07-28	2007-09-09	1	1	1	0
2011-022067	THROAT SWAB	2017-07-31	2011-09-08	9	1	1	0
2009-012424	PUS SWAB	2017-08-10	2009-06-02	1	1	1	0
2013-022035	THROAT SWAB	2017-08-14	2012-03-31	0	1	1	0
2017-019466	THROAT SWAB	2017-08-16	2017-04-19	9	0	1	1
2016-026881	BLOOD CULTURE	2017-08-18	2016-08-27	1	9	9	0
2016-026881	THROAT SWAB	2017-08-20	2016-08-27	9	0	1	1
01-2014-004514	PUS SWAB	2017-08-23	2014-09-03	1	9	9	0
01-2017-003908	PUS SWAB	2017-08-25	2015-03-01	1	9	9	0
2011-022067	BLOOD CULTURE	2017-08-26	2011-09-08	1	9	9	0
2017-021584	BLOOD CULTURE	2017-08-30	2012-08-13	1	9	9	0
01-2017-004005	EAR SWAB	2017-08-30	2007-06-12	1	9	9	0
2017-021584	THROAT SWAB	2017-08-31	2012-08-13	9	1	1	0
2017-021584	THROAT SWAB	2017-09-02	2012-08-13	9	1	1	0
2013-021634	PUS SWAB	2017-09-11	2003-12-05	1	1	1	0
01-2017-004300	PUS SWAB	2017-09-12	2016-03-01	1	9	9	0
01-2015-000057	PUS SWAB	2017-09-13	2014-11-20	1	9	9	0
2014-020721	BLOOD CULTURE	2017-09-18	2014-07-07	1	9	9	0
2014-020721	THROAT SWAB	2017-09-19	2014-07-07	9	1	1	0
2012-008678	PUS SWAB	2017-10-05	2010-12-19	1	9	9	0
2016-020357	SKIN / WOUND SWAB	2017-10-07	2009-12-24	1	1	1	0
01-2017-003438	THROAT SWAB	2017-10-26	2011-12-01	9	1	1	0
2016-011207	PUS SWAB	2017-10-26	2015-09-10	1	1	1	0
2017-028773	PUS (CLOSED / DEEP SITE)	2017-11-15	2006-11-05	1	1	1	0
2014-026812	PUS (CLOSED / DEEP SITE)	2017-11-16	2005-10-14	1	1	1	0
2016-004209	THROAT SWAB	2017-11-21	2015-08-23	1	1	1	0
2012-015938	PUS (CLOSED / DEEP SITE)	2017-11-21	2012-06-10	1	9	9	0
2013-020720	THROAT SWAB	2017-12-03	2012-11-02	9	1	1	0
2016-005204	PUS (CLOSED / DEEP SITE)	2017-12-05	2012-02-27	1	9	9	0
2017-031723	BLOOD CULTURE	2017-12-17	2016-11-06	1	9	9	0
